# Supplementary material
Source: Research Square preprint supplement (doi:10.21203/rs.3.rs-9285792/v1)
Supplement: Supplementary file 1 [file 1a6f1d07877edf0070d3acf4.docx]

## **Supplementary Figure Legends**


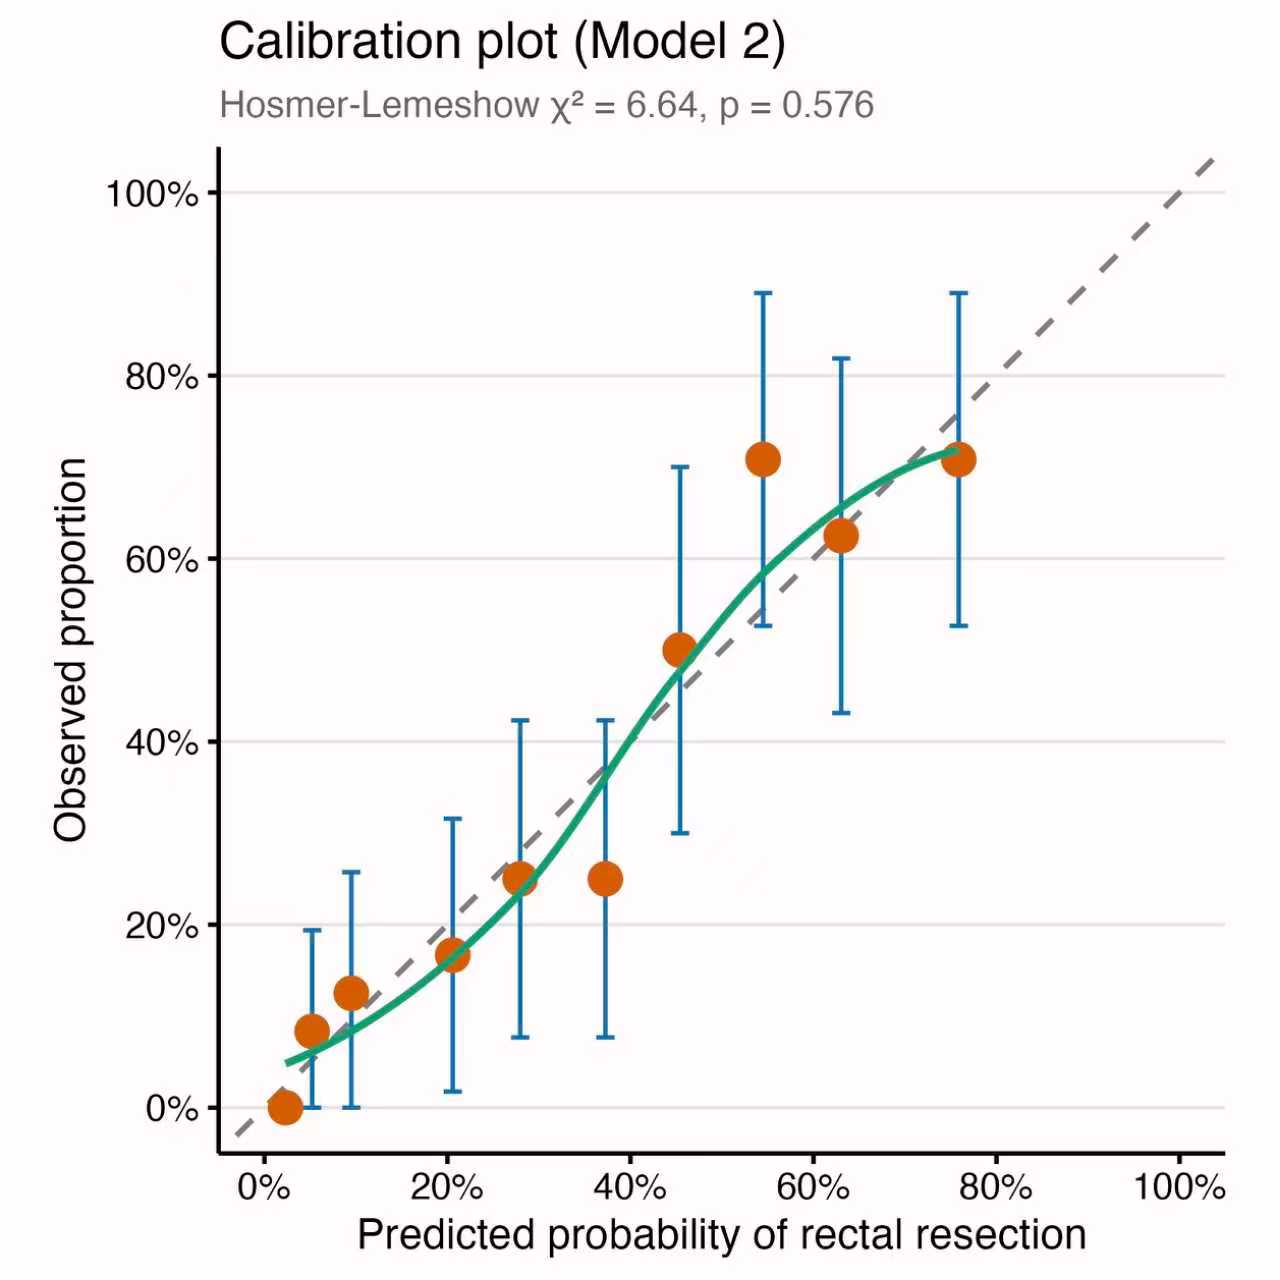


**Supplementary eFigure 1.** Calibration plot for the primary prediction model (Model 2: compartments + age + rAFS stage) predicting segmental rectal resection. Points represent observed proportions within deciles of predicted probability; error bars show 95% confidence intervals. The dashed diagonal line represents perfect calibration. The smooth curve (LOESS) shows the calibration trend. Hosmer–Lemeshow χ² = 6.64, p = 0.576, indicating adequate calibration.
