# Supplementary material
Source: Research Square preprint supplement (doi:10.21203/rs.3.rs-9285792/v1)
Supplement: Supplementary file 2 [file ffbe12102986855e1e38d143.xlsx]

## Sheet: eTable1_Site_Prevalence
Supplementary eTable 1. Prevalence of endometriosis involvement at 29 predefined pelvic sites
Site (Chinese)	Site (English)	Compartment	n	%
骶韧带_L	Uterosacral ligament_L	Lateral	238	59.8
骶韧带_R	Uterosacral ligament_R	Lateral	236	59.3
卵巢_L	Ovary_L	Adnexal	209	52.5
卵巢_R	Ovary_R	Adnexal	206	51.8
肠壁（结直肠）_L	Rectal/colorectal wall_L	Posterior	136	34.2
子宫体_L	Uterine body_L	Central	128	32.2
阴道壁_L	Vaginal wall_L	Posterior	64	16.1
阴道后穹窿_L	Posterior vaginal fornix_L	Posterior	54	13.6
阴道直肠膈_L	Rectovaginal septum_L	Posterior	32	8
输卵管_L	Fallopian tube_L	Adnexal	27	6.8
宫颈_L	Cervix_L	Central	27	6.8
宫颈后_L	Posterior cervix_L	Central	21	5.3
输卵管_R	Fallopian tube_R	Adnexal	19	4.8
输尿管_L	Ureter_L	Lateral	17	4.3
输尿管旁_L	Periureteral_L	Lateral	14	3.5
小肠_L	Small bowel_L	Posterior	13	3.3
输尿管_R	Ureter_R	Lateral	11	2.8
输尿管旁_R	Periureteral_R	Lateral	11	2.8
盆壁_R	Pelvic sidewall_R	Lateral	11	2.8
腹膜_L	Peritoneum_L	Other	11	2.8
子宫直肠陷凹_L	Pouch of Douglas_L	Posterior	10	2.5
输尿管表面_L	Ureteral surface_L	Lateral	8	2
输尿管表面_R	Ureteral surface_R	Lateral	8	2
膀胱壁_L	Bladder wall_L	Anterior	8	2
阔韧带_R	Broad ligament_R	Lateral	7	1.8
闭孔淋巴结_L	Obturator lymph node_L	Other	6	1.5
膀胱腹膜反折_L	Bladder peritoneal fold_L	Anterior	6	1.5
圆韧带_L	Round ligament_L	Lateral	5	1.3
阔韧带_L	Broad ligament_L	Lateral	5	1.3
宫旁_L	Parametrium_L	Central	5	1.3
主韧带_R	Cardinal ligament_R	Lateral	4	1
子宫动脉_L	Uterine artery_L	Lateral	4	1
子宫动脉_R	Uterine artery_R	Lateral	4	1
盆壁_L	Pelvic sidewall_L	Lateral	4	1
阑尾_L	Appendix_L	Other	4	1
腹壁_L	Abdominal wall_L	Other	4	1
圆韧带_R	Round ligament_R	Lateral	2	0.5
主韧带_L	Cardinal ligament_L	Lateral	2	0.5
漏斗韧带_L	Infundibulopelvic ligament_L	Lateral	2	0.5
输卵管系膜_L	Mesosalpinx_L	Adnexal	1	0.3
输卵管系膜_R	Mesosalpinx_R	Adnexal	1	0.3
卵巢固有韧带_L	Ovarian ligament_L	Adnexal	1	0.3
卵巢固有韧带_R	Ovarian ligament_R	Adnexal	1	0.3
漏斗韧带_R	Infundibulopelvic ligament_R	Lateral	1	0.3
会阴_L	Perineum_L	Other	1	0.3
闭孔_L	Obturator_L	Other	1	0.3
闭孔_R	Obturator_R	Other	1	0.3
闭孔淋巴结_R	Obturator lymph node_R	Other	1	0.3
髂内血管旁_L	Internal iliac perivascular_L	Other	1	0.3
髂外血管旁_L	External iliac perivascular_L	Other	1	0.3
膀胱阴道膈_L	Vesicovaginal septum_L	Anterior	1	0.3
腹部切口（腹壁）_L	Abdominal incision_L	Other	1	0.3
肛提肌_L	Levator ani_L	Other	1	0.3
腹膜后_L	Retroperitoneum_L	Other	1	0.3
坐骨神经（周围、鞘膜）_L	Sciatic nerve_L	Other	1	0.3
臀上神经_L	Superior gluteal nerve_L	Other	1	0.3
脐轮_L	Umbilical ring_L	Other	1	0.3
子宫后壁_L	Posterior uterine wall_L	Other	1	0.3
髂外血管旁_R	External iliac perivascular_R	Other	0	0
髂内动脉_L	Internal iliac artery_L	Other	0	0
髂内动脉_R	Internal iliac artery_R	Other	0	0
髂外动脉_L	External iliac artery_L	Other	0	0
髂外动脉_R	External iliac artery_R	Other	0	0
大网膜_L	Greater omentum_L	Other	0	0
坐骨神经（周围、鞘膜）_R	Sciatic nerve_R	Other	0	0
腹股沟淋巴结_L	Inguinal lymph node_L	Other	0	0
腹股沟淋巴结_R	Inguinal lymph node_R	Other	0	0
腰大肌_L	Psoas major_L	Other	0	0
髂窝_L	Iliac fossa_L	Other	0	0
髂窝_R	Iliac fossa_R	Other	0	0

## Sheet: eTable2_Coinvolvement
Supplementary eTable 2. Compartment co-involvement matrix
Panel A: Pearson correlation coefficients (phi approximation)
	Posterior	Central	Adnexal	Lateral	Anterior
Posterior	1	0.016	-0.231	-0.184	0.08
Central	0.016	1	-0.037	0.059	-0.06
Adnexal	-0.231	-0.037	1	0.181	-0.009
Lateral	-0.184	0.059	0.181	1	0.06
Anterior	0.08	-0.06	-0.009	0.06	1
Panel B: Number of patients with co-involvement (n)
	Posterior	Central	Adnexal	Lateral	Anterior
Posterior	212	90	140	159	11
Central	90	166	122	140	4
Adnexal	140	122	300	257	11
Lateral	159	140	257	325	14
Anterior	11	4	11	14	15

## Sheet: eTable3_Missing_Data
Supplementary eTable 3. Missing data summary
Variable	n_available	n_missing	pct_missing
dyspareunia_bin	60	338	84.9
infertility_bin	113	285	71.6
double_j_stent_bin	147	251	63.1
dyschezia_bin	155	243	61.1
afs_stage	240	158	39.7
surgeon_clean	289	109	27.4
drain_placed_bin	337	61	15.3
dysmenorrhea_bin	360	38	9.5
op_time_min	393	5	1.3
los_days	396	2	0.5
gravidity	397	1	0.3
parity	397	1	0.3
age	398	0	0
blood_loss_ml	398	0	0
rectal_resection	398	0	0
comp_posterior	398	0	0
comp_central	398	0	0
comp_adnexal	398	0	0
comp_lateral	398	0	0
comp_anterior	398	0	0

## Sheet: eTable4_MICE_Diagnostics
Supplementary eTable 4. Multiple imputation diagnostics
Imputation method: Multiple Imputation by Chained Equations (MICE)
Number of imputations: 20
Maximum iterations: 20
Method: Predictive mean matching (pmm)
Variables included in imputation model:
- rectal_resection, afs_stage, age, gravidity, parity
- blood_loss_ml, op_time_min, los_days
- dysmenorrhea_bin, dyspareunia_bin, dyschezia_bin, infertility_bin
- comp_posterior, comp_central, comp_adnexal, comp_lateral, comp_anterior
- n_compartments, double_j_stent_bin, drain_placed_bin
Primary variable with missingness: rAFS stage (39.7% missing)
All compartment variables and rectal resection outcome: 0% missing

## Sheet: eTable5_Sensitivity
Supplementary eTable 5. Pre-specified sensitivity analyses (S1-S6)
S1: MICE imputed AUC
n_imputations	mean_auc	sd_auc	min_auc	max_auc	cc_auc
20	0.861	0.0067	0.85	0.872	0.819
Note: Compare mean_auc vs cc_auc; should be close
S2: Surgeon Yao Shuzong only
n	rectal_n	auc
143	44	0.844
Note: Compare with primary (full cohort)
S3: Exclude blood loss > 1000 mL
n_excluded	n	auc
4	237	0.818
S4: Temporal adjustment (+ surgery year)
n	auc	year_beta	year_p
144	0.929	-0.2436	0.316
Note: year_p > 0.05 suggests no temporal trend
S5: LASSO on individual lesion sites
n	n_sites	n_selected	selected_sites	lambda_1se	lasso_auc
390	70	3	阴道壁_L; 肠壁（结直肠）_L; 小肠_L	0.0599	0.847
Note: Compare with compartment model AUC
S6: Stratified – patients WITH rectal wall involvement
n	rectal_resec_n	auc
120	64	0.737
Note: Addresses circularity concern: non-trivial predictors remain

## Sheet: eTable6_Full_Logistic
Supplementary eTable 6. Full logistic regression output (Model 2)
Characteristic	N	Event N	OR	p-value	95% CI
Posterior compartment	240	82	4.28	<0.001	1.87, 10.8
Central/uterine compartment	240	82	0.32	<0.001	0.16, 0.62
Adnexal compartment	240	82	0.28	0.002	0.12, 0.60
Lateral/parametrial compartment	240	82	1.12	0.8	0.53, 2.38
Anterior compartment	240	82	1.36	0.6	0.36, 5.37
Age (years)	240	82	1.07	0.027	1.01, 1.14
rAFS stage (per stage increase)	240	82	5.81	<0.001	2.90, 12.7

## Sheet: eTable7_GLM_Outcomes
Supplementary eTable 7. Full generalised linear model output for surgical outcomes
outcome	family	model	coef_label	estimate_fmt	p_fmt	estimate	conf.low	conf.high	p.value
Blood loss (mL)	Gamma GLM	Model A (without rectal resection)	Posterior compartment	0.98 (0.78–1.23)	0.878	0.981746	0.781886	1.22513	0.878289
Blood loss (mL)	Gamma GLM	Model A (without rectal resection)	Central compartment	0.94 (0.77–1.16)	0.575	0.942761	0.76715	1.16016	0.574546
Blood loss (mL)	Gamma GLM	Model A (without rectal resection)	Adnexal compartment	0.91 (0.72–1.15)	0.455	0.91254	0.72347	1.14897	0.455061
Blood loss (mL)	Gamma GLM	Model A (without rectal resection)	Lateral compartment	0.91 (0.70–1.17)	0.452	0.907832	0.696412	1.17074	0.452002
Blood loss (mL)	Gamma GLM	Model A (without rectal resection)	Anterior compartment	1.64 (1.03–2.76)	0.045	1.63851	1.02937	2.76331	0.0449502
Blood loss (mL)	Gamma GLM	Model A (without rectal resection)	Age (years)	1.01 (0.99–1.03)	0.301	1.01032	0.990553	1.03046	0.301056
Blood loss (mL)	Gamma GLM	Model A (without rectal resection)	rAFS stage	1.43 (1.20–1.69)	<0.001	1.42888	1.2027	1.69235	0.000451404
Blood loss (mL)	Gamma GLM	Model B (with rectal resection)	Posterior compartment	0.92 (0.74–1.13)	0.449	0.917999	0.741723	1.13044	0.449108
Blood loss (mL)	Gamma GLM	Model B (with rectal resection)	Central compartment	1.06 (0.86–1.30)	0.568	1.05824	0.863857	1.29733	0.567554
Blood loss (mL)	Gamma GLM	Model B (with rectal resection)	Adnexal compartment	0.97 (0.78–1.20)	0.771	0.967081	0.777583	1.20126	0.771066
Blood loss (mL)	Gamma GLM	Model B (with rectal resection)	Lateral compartment	0.89 (0.70–1.12)	0.325	0.889934	0.698102	1.12435	0.324747
Blood loss (mL)	Gamma GLM	Model B (with rectal resection)	Anterior compartment	1.62 (1.05–2.61)	0.034	1.61799	1.05459	2.60718	0.0338132
Blood loss (mL)	Gamma GLM	Model B (with rectal resection)	Age (years)	1.01 (0.99–1.03)	0.480	1.00655	0.988335	1.02511	0.479587
Blood loss (mL)	Gamma GLM	Model B (with rectal resection)	rAFS stage	1.33 (1.12–1.57)	0.004	1.32847	1.12384	1.56579	0.00389022
Blood loss (mL)	Gamma GLM	Model B (with rectal resection)	Rectal resection	1.42 (1.14–1.78)	0.003	1.42025	1.13619	1.77906	0.00259181
log(Operating time, min)	OLS	Model A (without rectal resection)	Posterior compartment	0.11 (0.00–0.22)	0.042	0.113508	0.00412743	0.222888	0.0420259
log(Operating time, min)	OLS	Model A (without rectal resection)	Central compartment	0.02 (-0.08–0.11)	0.700	0.0186806	-0.0767772	0.114138	0.700146
log(Operating time, min)	OLS	Model A (without rectal resection)	Adnexal compartment	-0.10 (-0.21–0.01)	0.073	-0.101252	-0.211925	0.00942193	0.0727588
log(Operating time, min)	OLS	Model A (without rectal resection)	Lateral compartment	-0.02 (-0.14–0.09)	0.718	-0.0211951	-0.136839	0.0944485	0.718326
log(Operating time, min)	OLS	Model A (without rectal resection)	Anterior compartment	0.23 (0.01–0.45)	0.043	0.228605	0.00779839	0.449411	0.042502
log(Operating time, min)	OLS	Model A (without rectal resection)	Age (years)	0.01 (-0.00–0.02)	0.057	0.00875489	-0.000278463	0.0177882	0.0574289
log(Operating time, min)	OLS	Model A (without rectal resection)	rAFS stage	0.33 (0.23–0.42)	<0.001	0.32598	0.234748	0.417213	2.25116e-11
log(Operating time, min)	OLS	Model B (with rectal resection)	Posterior compartment	0.05 (-0.05–0.16)	0.310	0.0538605	-0.0505142	0.158235	0.310314
log(Operating time, min)	OLS	Model B (with rectal resection)	Central compartment	0.08 (-0.02–0.17)	0.103	0.076035	-0.015426	0.167496	0.102779
log(Operating time, min)	OLS	Model B (with rectal resection)	Adnexal compartment	-0.04 (-0.14–0.07)	0.482	-0.037793	-0.143615	0.0680286	0.482314
log(Operating time, min)	OLS	Model B (with rectal resection)	Lateral compartment	-0.03 (-0.14–0.07)	0.527	-0.034838	-0.143162	0.0734866	0.526896
log(Operating time, min)	OLS	Model B (with rectal resection)	Anterior compartment	0.21 (0.00–0.41)	0.049	0.207845	0.00108347	0.414606	0.0488215
log(Operating time, min)	OLS	Model B (with rectal resection)	Age (years)	0.01 (-0.00–0.01)	0.245	0.00506105	-0.00348657	0.0136087	0.244544
log(Operating time, min)	OLS	Model B (with rectal resection)	rAFS stage	0.24 (0.15–0.33)	<0.001	0.2419	0.15181	0.331991	2.87144e-07
log(Operating time, min)	OLS	Model B (with rectal resection)	Rectal resection	0.31 (0.20–0.42)	<0.001	0.310908	0.204589	0.417228	2.69833e-08
LOS (days)	Negative Binomial	Model A (without rectal resection)	Posterior compartment	1.26 (1.09–1.46)	0.002	1.25916	1.08666	1.45768	0.00212611
LOS (days)	Negative Binomial	Model A (without rectal resection)	Central compartment	0.86 (0.76–0.98)	0.022	0.86283	0.760319	0.979368	0.022057
LOS (days)	Negative Binomial	Model A (without rectal resection)	Adnexal compartment	0.86 (0.74–1.00)	0.049	0.863144	0.742368	1.0029	0.048795
LOS (days)	Negative Binomial	Model A (without rectal resection)	Lateral compartment	1.04 (0.89–1.21)	0.646	1.03656	0.887964	1.20817	0.646322
LOS (days)	Negative Binomial	Model A (without rectal resection)	Anterior compartment	0.98 (0.74–1.32)	0.900	0.98176	0.737881	1.3186	0.90011
LOS (days)	Negative Binomial	Model A (without rectal resection)	Age (years)	1.00 (0.99–1.01)	0.638	1.00284	0.99099	1.01483	0.638433
LOS (days)	Negative Binomial	Model A (without rectal resection)	rAFS stage	1.35 (1.19–1.52)	<0.001	1.34526	1.18869	1.52274	1.96872e-06
LOS (days)	Negative Binomial	Model B (with rectal resection)	Posterior compartment	1.16 (1.00–1.34)	0.044	1.15911	1.00371	1.33755	0.0436629
LOS (days)	Negative Binomial	Model B (with rectal resection)	Central compartment	0.94 (0.83–1.07)	0.345	0.942188	0.831543	1.06782	0.345264
LOS (days)	Negative Binomial	Model B (with rectal resection)	Adnexal compartment	0.92 (0.80–1.06)	0.252	0.920075	0.795844	1.0632	0.252397
LOS (days)	Negative Binomial	Model B (with rectal resection)	Lateral compartment	1.01 (0.87–1.17)	0.874	1.01194	0.872961	1.17165	0.87367
LOS (days)	Negative Binomial	Model B (with rectal resection)	Anterior compartment	0.97 (0.74–1.29)	0.835	0.971348	0.739287	1.28553	0.835154
LOS (days)	Negative Binomial	Model B (with rectal resection)	Age (years)	1.00 (0.99–1.01)	0.746	0.998112	0.986719	1.00962	0.746343
LOS (days)	Negative Binomial	Model B (with rectal resection)	rAFS stage	1.20 (1.06–1.36)	0.004	1.20112	1.05996	1.36121	0.00353114
LOS (days)	Negative Binomial	Model B (with rectal resection)	Rectal resection	1.46 (1.27–1.69)	<0.001	1.46346	1.27144	1.68508	9.81507e-08

## Sheet: eTable8_Mediation
Supplementary eTable 8. Causal mediation analysis details
outcome	effect	estimate	ci_lower	ci_upper	p_value	estimate_fmt	ci_fmt	p_fmt
Blood loss (mL)	ACME (indirect via rectal resection)	32.0968	11.1444	60.9342	0	32.097	[11.144, 60.934]	<0.001
Blood loss (mL)	ADE (direct, not through rectal resection)	-28.0125	-63.3078	17.6802	0.21	-28.012	[-63.308, 17.680]	0.210
Blood loss (mL)	Total effect	-0.352424	-32.9089	44.3331	0.8	-0.352	[-32.909, 44.333]	0.800
Blood loss (mL)	Proportion mediated	-91.0742	-20.8838	26.4294	0.8	-91.074	[-20.884, 26.429]	0.800
LOS (days)	ACME (indirect via rectal resection)	2.12878	1.27305	3.28956	0	2.129	[1.273, 3.290]	<0.001
LOS (days)	ADE (direct, not through rectal resection)	2.52537	1.37063	3.70008	0	2.525	[1.371, 3.700]	<0.001
LOS (days)	Total effect	5.30371	3.64258	7.22509	0	5.304	[3.643, 7.225]	<0.001
LOS (days)	Proportion mediated	0.401376	0.251899	0.592894	0	0.401	[0.252, 0.593]	<0.001
